# Supplementary material
Source: ML conference proceedings conference paper supplement (https://openaccess.thecvf.com/content/CVPR2022/html/Li_Compositional_Temporal_Grounding_CVPR_2022_paper.html)
Supplement: Supplementary file 1 [file Li_Compositional_Temporal_Grounding_CVPR_2022_supplemental.pdf]

# Compositional Temporal Grounding with Structured Variational Cross-Graph Correspondence Learning Supplementary Material

Anonymous CVPR submission

Paper ID 19

## 1. Overview

In this supplementary material we present:

- The detailed statistics of the proposed datasets (Section 2).
- Implementation details (Section 3).
- Additional experimental results (Section 4).
- Most common words in query sentences (Section 5).
- Most common novel compositions (Section 6).
- Most common novel words (Section 7).
- Additional examples (Section 8).

## 2. Dataset Statistics

Table 1 summarizes the detailed statistics of our proposed Charades-CG and ActivityNet-CG datasets.

The distribution of the composition types and their corresponding examples are illustrated in Figure 1. Note that adjective-noun phrases are rare in the original Charades-STA dataset, and most of them are some high-frequency phrases, so the proportion of novel adjective-noun compositions is relatively small in our Novel-Composition set.

## 3. Implementation Details

For all methods, we use the public official implementations to get their compositional temporal grounding results. We train them on the training set and evaluate them on the test-trivial, novel-composition, and novel-word splits respectively. Following [11], we use unified video and language features for more fair comparisons. Concretely, we use I3D features [2] for the video in Charades-CG and C3D features [10] for the videos in ActivityNet-CG. We use pre-trained GloVe [8] word vectors to initialize each word in the language queries.

In our proposed framework, we use the I3D model [2] pretrained on kinetics [6] dataset as our action detector, and use Faster R-CNN with ResNet-101 [1, 5, 9] pre-trained on Visual Genome [7] dataset as our object detector. For an untrimmed video, we divide it into a sequence of segments with a fixed length (*i.e.* 32 frames), and then adopt the off-the-shelf object and action detectors to extract objects and actions for each segment. For each segment, we select the top-3 action classes and top-5 object classes with the highest confidence score as action nodes and object nodes, respectively. The dimension of input video features is 1024 and the dimension of GloVe [8] vectors is 300. We set the dimension of all node (three hierarchies of the two graphs) representations as 384. During training, we set the batch size to 32 and use Adam as optimizer [3], where the learning rate is set to  $1e^{-4}$ .

## 4. Additional Experimental Results

We present the compositional temporal grounding performance of the CTRL [4] and SCDM [12] in Table 2.

## 5. Most Common Words in Query Sentences

Table 3 and Table 4 show the most common nouns, verbs, adjectives, adverbs, and prepositions, respectively.

## 6. Most Common Novel Compositions

We show the most common novel compositions in Table 5 and Table 6.

## 7. Most Common Novel Words

Table 7 and Table 8 show the most common novel words.

## 8. Additional Examples

Figure 2 and Figure 3 show some more examples in the novel-composition and novel-word splits of the Charades-CG dataset. Figure 4 and Figure 5 show some more exam-

| Dataset        | Split             | Videos | Average Video Length | Queries | Average Query Length |
|----------------|-------------------|--------|----------------------|---------|----------------------|
| Charades-CG    | Training          | 3555   | 30.58s               | 8281    | 5.93                 |
|                | Novel-Composition | 2480   | 30.70s               | 3442    | 6.86                 |
|                | Novel-Word        | 588    | 31.26s               | 703     | 7.24                 |
|                | Test-Trivial      | 1689   | 30.82s               | 3096    | 5.96                 |
| ActivityNet-CG | Training          | 9659   | 116.94s              | 36724   | 13.33                |
|                | Novel-Composition | 4202   | 121.12s              | 12028   | 14.78                |
|                | Novel-Word        | 2011   | 124.35s              | 3944    | 14.61                |
|                | Test-Trivial      | 4775   | 119.60s              | 15712   | 11.31                |

Table 1. Statistics of Charades-CG and ActivityNet-CG.

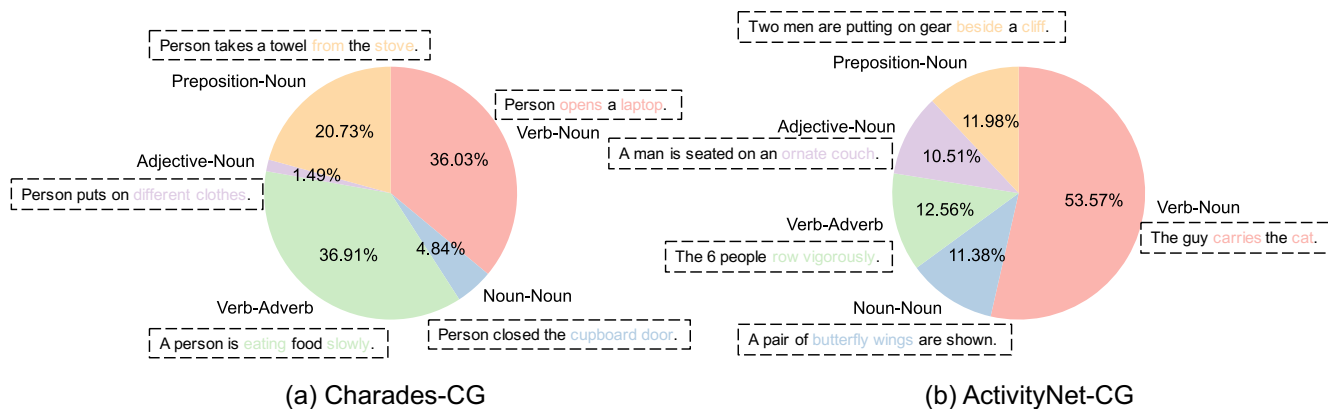

Figure 1. The distribution of the composition types. Texts inside dashed boxes are query examples for each composition type.

| Method | Dataset        | <i>Test-Trivial</i> |         |       | <i>Novel-Composition</i> |         |       | <i>Novel-Word</i> |         |       |
|--------|----------------|---------------------|---------|-------|--------------------------|---------|-------|-------------------|---------|-------|
|        |                | IoU=0.5             | IoU=0.7 | mIoU  | IoU=0.5                  | IoU=0.7 | mIoU  | IoU=0.5           | IoU=0.7 | mIoU  |
| CTRL   | Charades-CG    | 18.53               | 8.59    | 22.03 | 4.62                     | 0.17    | 11.21 | 4.22              | 0.22    | 10.60 |
|        | ActivityNet-CG | 13.25               | 4.49    | 17.51 | 5.22                     | 1.55    | 11.21 | 5.17              | 1.59    | 11.17 |
| SCDM   | Charades-CG    | 46.63               | 24.17   | 42.08 | 27.73                    | 12.25   | 30.84 | 26.20             | 11.69   | 27.64 |
|        | ActivityNet-CG | 37.86               | 22.41   | 40.09 | 21.32                    | 9.34    | 28.52 | 20.73             | 8.95    | 27.46 |

Table 2. Additional experimental results of CTRL and SCDM on the Charades-CG and ActivityNet-CG datasets.

ples in the novel-composition and novel-word splits of the Charades-CG dataset.

| Type        | Most Common Words                                                                                                                                                                                                                   |
|-------------|-------------------------------------------------------------------------------------------------------------------------------------------------------------------------------------------------------------------------------------|
| Noun        | person, door, light, glass, book, shoe, bag, table, food, sandwich, box, cabinet, chair, laptop, window, cup, shelf, room, clothes, floor, phone, pillow, water, doorway, closet, picture, bed, refrigerator, blanket, towel        |
| Verb        | be, put, open, take, eat, close, sit, hold, turn, run, throw, drink, start, begin, walk, sneeze, look, laugh, smile, pour, stand, cook, undress, watch, awaken, wash, dress, fix, read, play                                        |
| Adjective   | open, other, laundry, second, same, front, small, light, nearby, few, dressed, more, plastic, dirty, first, multiple, undress, large, different, undressed, several, entryway, close, red, next, oven, folded, full, closed, little |
| Adverb      | away, back, inside, next, also, finally, around, again, when, quickly, outside, so, down, aside, in, there, where, repeatedly, suddenly, out, still, nearby, on, twice, slowly, just, very, by, off, later                          |
| Preposition | on, in, of, from, off, into, down, at, up, out, to, with, through, onto, by, as, behind, over, for, under, around, towards, away, after, across, inside, toward, against, outside, past                                             |

Table 3. Most common words of query sentences in the Charades-CG dataset.

| Type        | Most Common Words                                                                                                                                                                                            |
|-------------|--------------------------------------------------------------------------------------------------------------------------------------------------------------------------------------------------------------|
| Noun        | man, woman, people, camera, person, girl, ball, men, hand, water, boy, screen, front, group, side, dog, hair, lady, field, table, room, shirt, game, car, video, shot, floor, time, bar, horse               |
| Verb        | be, show, see, play, stand, walk, continue, hold, talk, begin, do, sit, put, speak, use, jump, run, take, go, get, throw, move, watch, start, rid, wear, hit, look, make, appear                             |
| Adjective   | several, other, white, large, more, black, young, small, blue, red, various, little, different, green, close, long, high, same, yellow, many, old, slow, few, first, right, wooden, ready, pink, big, fourth |
| Adverb      | then, back, around, again, how, as, well, next, together, away, when, still, outside, all, down, very, after, finally, forth, also, where, now, up, quickly, over, forward, more, once, just, slowly         |
| Preposition | in, of, on, with, to, up, into, as, down, at, around, off, by, from, over, out, for, behind, onto, before, after, along, through, about, across, inside, towards, under, against, between                    |

Table 4. Most common words of query sentences in the ActivityNet-CG dataset.

| Type             | Novel Compositions                                                                                                                             |
|------------------|------------------------------------------------------------------------------------------------------------------------------------------------|
| Verb-Noun        | throw pillow, open laptop, close laptop, pour coffee, tidy wardrobe,                                                                           |
|                  | close window, throw shoe, throw book, throw box, watch car,                                                                                    |
|                  | watch laptop, wash window, carry towel, throw broom, wash table                                                                                |
| Adjective-Noun   | different clothes, young woman, few grocery, small closet, same window,                                                                        |
|                  | bottom shelf, several drink, small refridgerator, small desk, bottom cabinet,                                                                  |
|                  | young guy, different person, more soda, few notebook, near doorway                                                                             |
| Preposition-Noun | with towel, in wardrobe, around box, on head, into hallway,                                                                                    |
|                  | towards table, for work, inside cabinet, under desk, through hall,                                                                             |
|                  | outside door, onto wall, above stove, over top, past door way                                                                                  |
| Noun-Noun        | medicine bottle, cupboard door, closet doorknob, kitchen pantry, laptop bag,                                                                   |
|                  | work clothes, bathroom shelf, towel rack, wine glass, phone camera,                                                                            |
|                  | shower curtain, food bag, detergent cabinet, food dish, kitchen doorway                                                                        |
| Verb-Adverb      | awaken suddenly, come suddenly, eat slowly, sneeze repeatedly, awaken quickly,                                                                 |
|                  | throw repeatedly, undress partially, dress quickly, read intensely, look back,<br>dress again, smile together, open twice, look over, come out |

Table 5. We present 15 common novel compositions of each type in the Charades-CG dataset.

| Type             | Novel Compositions                                                                                                                                                        |
|------------------|---------------------------------------------------------------------------------------------------------------------------------------------------------------------------|
| Verb-Noun        | pull row, advertise event, boil noodle, announce winner, pick hose,                                                                                                       |
|                  | wipe boot, see boxer, push rake, extend palm, lower cap,                                                                                                                  |
|                  | find friend, park bike, remove plastic, leave chair, fill basket,                                                                                                         |
| Adjective-Noun   | live music, cold river, large museum, red vase, different pumpkin,                                                                                                        |
|                  | golden coin, vacant kitchen, crowded stage, dry land, furry dog,                                                                                                          |
|                  | tiny fish, messy bedroom, wooden shelf, strange costume, green plate                                                                                                      |
| Preposition-Noun | towards sea, beside box, behind building, against target, around lady,                                                                                                    |
|                  | after stone, below surface, with certificate, through pipe, in cabinet,                                                                                                   |
|                  | on logo, into store, along ridge, until stop, without teacher                                                                                                             |
| Noun-Noun        | hockey tournament, girl referee, sea turtle, kid playground, foot pedal,                                                                                                  |
|                  | princess costume, baby shark, farm building, group selfie, race trail,                                                                                                    |
|                  | fire stick, sugar mixture, stone tunnel, art skill, music book                                                                                                            |
| Verb-Adverb      | add directly, sit backward, fly away, move vigorously, work carefully                                                                                                     |
|                  | hit immediately, leave suddenly, plan carefully, remove quickly, groom cleanly,<br>go speedily, aim accurately, play passionately, kick repeatedly, complete successfully |

Table 6. We present 15 common novel compositions of each type in the ActivityNet-CG dataset.

| Type      | Novel Words                                                                                                |
|-----------|------------------------------------------------------------------------------------------------------------|
| Verb      | talk, bend, prepare, cover, kick, prepare, need, stretch, let, struggle,                                   |
|           | slide, toss, encounter, drop, pack, burn, cause, examine, swing, lift                                      |
| Noun      | hand, stair, hair, dryer, corner, tissue, stack, cave, basket, dinner,                                     |
|           | arm, reflection, remote, tool, coat, sheet, bucket, wrapper, cap, napkin                                   |
| Adjective | old, funny, white, bright, fresh, dusty, hot, sick, canvas, stray,                                         |
|           | dim, rampant, original, visible, confused, own, humorous, favorite, loud, short                            |
| Adverb    | somewhere, well, slightly, furiously, periodically, constantly, freshly, intently, really, downstairs,     |
|           | randomly, thoughtfully, everywhere, continuously, gently, lastly, simultaneously, somewhat, shortly, often |

Table 7. We present 20 common novel words of each type in the Charades-CG dataset.

| Type      | Novel Words                                                                                                                                                                                                              |
|-----------|--------------------------------------------------------------------------------------------------------------------------------------------------------------------------------------------------------------------------|
| Verb      | mop, encase, utter, moisten, analyze, encase, cling, radiate, cultivate, disconnect, retouch, originate, matter, reconstruct, resist, boost, endorse, identify, surpass, consume                                         |
| Noun      | bull, camel, pumpkin, dart, shield, carpenter, theory, hunting, washboard, killer, priest, ox, rapper, hero, donkey, squid, extreme, physician, vacancy, mansion                                                         |
| Adjective | solitary, vivid, over, religious, acceptable, exotic, structural, glad, foggy, horrified, married, sequential, improper, evident, functional, european, hydraulic, strategic, mechanic, early                            |
| Adverb    | accurately, improperly, carelessly, confidently, identically, absolutely, remotely, cautiously, regardless, recently, anyway, furthermore, inwards, luxuriously, erratically, vividly, poorly, anyhow, whenever, greatly |

Table 8. We present 20 common novel words of each type in the ActivityNet-CG dataset.

Query: A person is **closing** the **window** in the dining room.

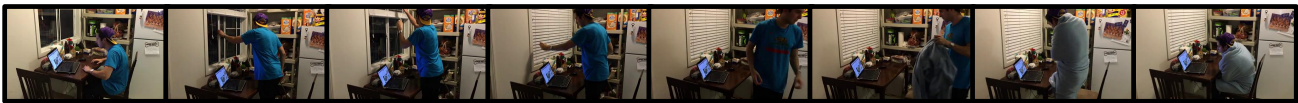

Ground-Truth 1.0s |-----| 7.0s

Query: The person takes a bag from the **bottom cabinet**.

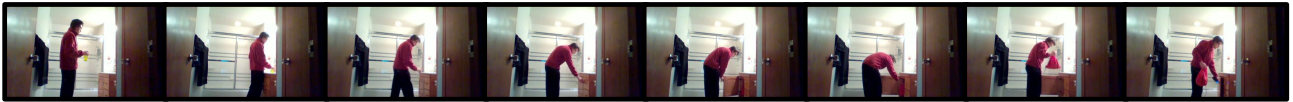

Ground-Truth 12.7s |-----| 19.9s

Query: The person closes a **cupboard door**.

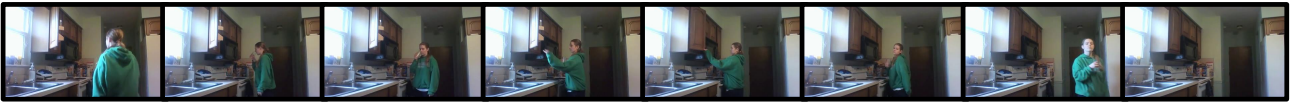

Ground-Truth 14.9s |-----| 21.9s

Query: The person washes the mirror **with** a **towel**.

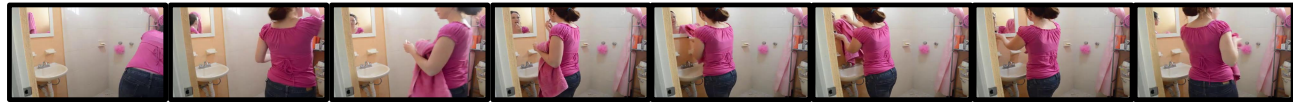

Ground-Truth 23.3s |-----| 36.5s

Query: Another person **suddenly comes** running through.

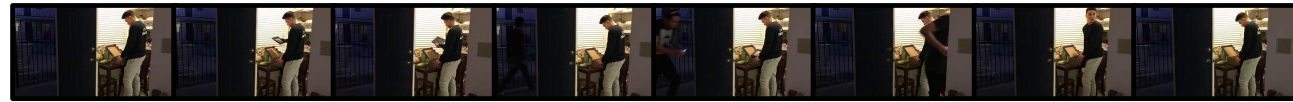

Ground-Truth 16.0s |-----| 21.8s

Figure 2. Examples in the novel-composition split of the Charades-CG dataset.

540  
541  
542  
543  
544  
545  
546  
547  
548  
549  
550  
551  
552  
553  
554  
555  
556  
557  
558  
559  
560  
561  
562  
563  
564  
565  
566  
567  
568  
569  
570  
571  
572  
573  
574  
575  
576  
577  
578  
579  
580  
581  
582  
583  
584  
585  
586  
587  
588  
589  
590  
591  
592  
593

594  
595  
596  
597  
598  
599  
600  
601  
602  
603  
604  
605  
606  
607  
608  
609  
610  
611  
612  
613  
614  
615  
616  
617  
618  
619  
620  
621  
622  
623  
624  
625  
626  
627  
628  
629  
630  
631  
632  
633  
634  
635  
636  
637  
638  
639  
640  
641  
642  
643  
644  
645  
646  
647

Query: The person was standing up reading a book, then bent down.

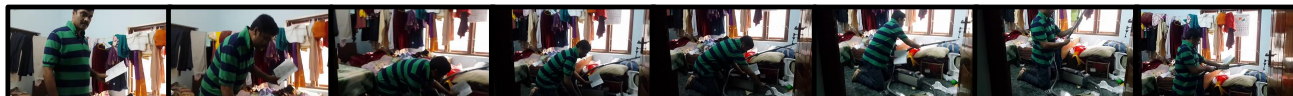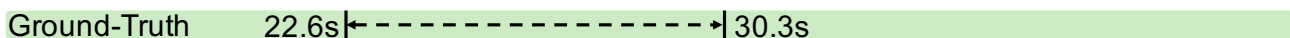

Query: The person takes a tissue from a tissue box.

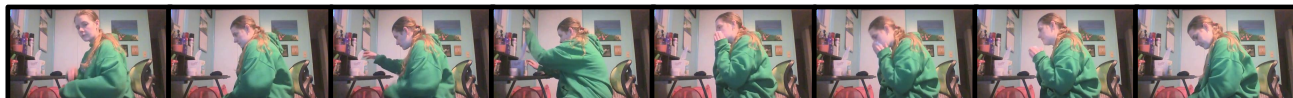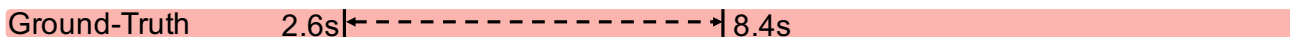

Query: Person puts the white pillow on the bed.

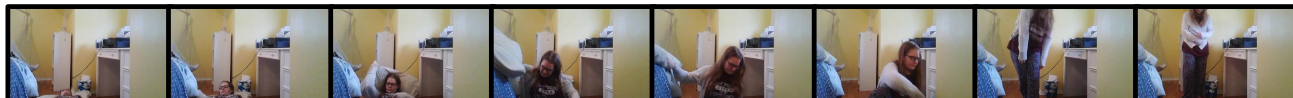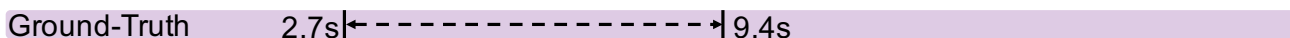

Query: Person they begin sneezing uncontrollably.

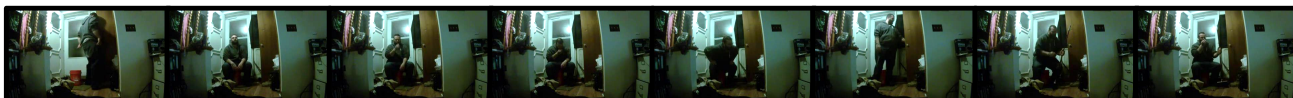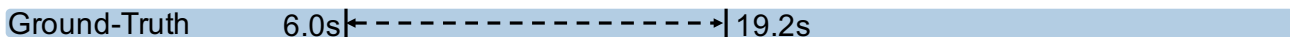

Figure 3. Examples in the novel-word split of the Charades-CG dataset.

648  
649  
650  
651  
652  
653  
654  
655  
656  
657  
658  
659  
660  
661  
662  
663  
664  
665  
666  
667  
668  
669  
670  
671  
672  
673  
674  
675  
676  
677  
678  
679  
680  
681  
682  
683  
684  
685  
686  
687  
688  
689  
690  
691  
692  
693  
694  
695  
696  
697  
698  
699  
700  
701

702  
703  
704  
705  
706  
707  
708  
709  
710  
711  
712  
713  
714  
715  
716  
717  
718  
719  
720  
721  
722  
723  
724  
725  
726  
727  
728  
729  
730  
731  
732  
733  
734  
735  
736  
737  
738  
739  
740  
741  
742  
743  
744  
745  
746  
747  
748  
749  
750  
751  
752  
753  
754  
755

Query: They fill a basket with hair products.

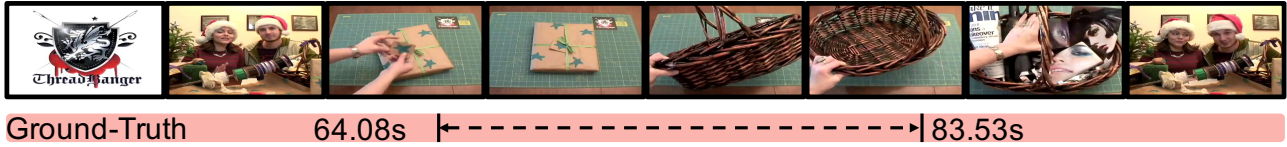

Query: A man is looking at a red vase.

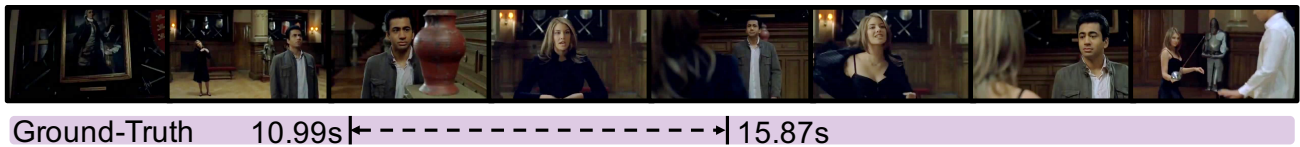

Query: Then, the person shows to wrap a square gift and made a paper flower.

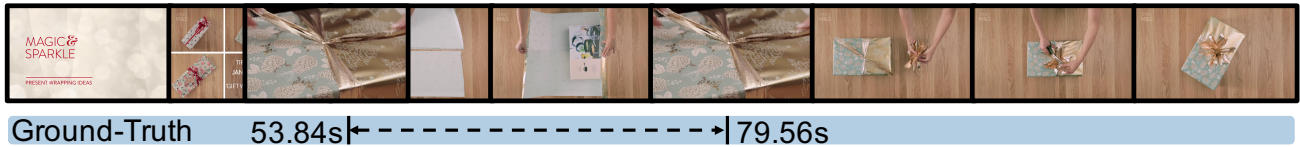

Query: A man and a woman are walking with their surfboards towards the sea.

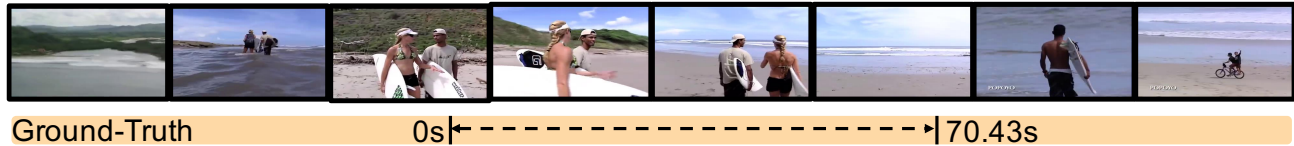

Query: The woman then gets on knees and sits backwards.

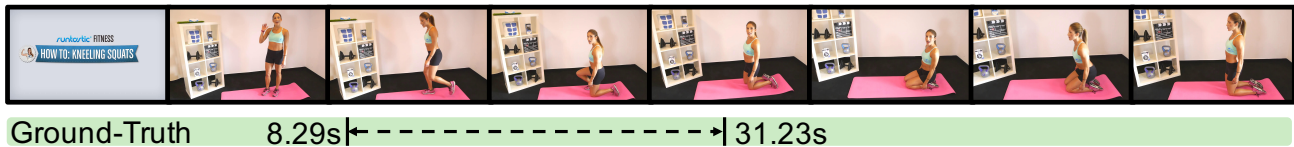

Figure 4. Examples in the novel-composition split of the ActivityNet-CG dataset.

756  
757  
758  
759  
760  
761  
762  
763  
764  
765  
766  
767  
768  
769  
770  
771  
772  
773  
774  
775  
776  
777  
778  
779  
780  
781  
782  
783  
784  
785  
786  
787  
788  
789  
790  
791  
792  
793  
794  
795  
796  
797  
798  
799  
800  
801  
802  
803  
804  
805  
806  
807  
808  
809

810  
811  
812  
813  
814  
815  
816  
817  
818  
819  
820  
821  
822  
823  
824  
825  
826  
827  
828  
829  
830  
831  
832  
833  
834  
835  
836  
837  
838  
839  
840  
841  
842  
843  
844  
845  
846  
847  
848  
849  
850  
851  
852  
853  
854  
855  
856  
857  
858  
859  
860  
861  
862  
863

Query: The man adjusts some of the gears to **disconnect** the brakes.

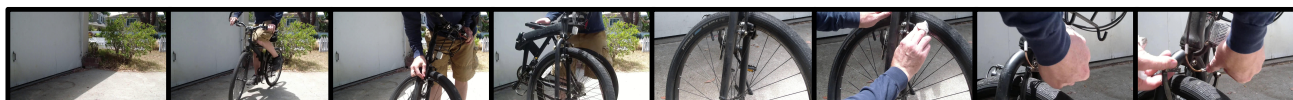

Ground-Truth 85.45s |-----> 138.44s

Query: An **ox** is held by a trainer in a city plaza

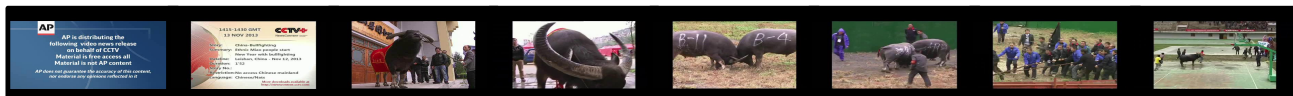

Ground-Truth 12.2s |-----> 22.56s

Query: He begins to attach a dummy while the woman looks **horrified**.

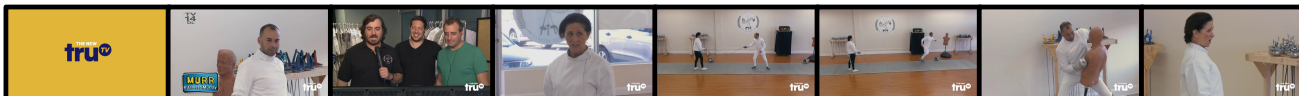

Ground-Truth 102.62s |-----> 119.38s

Query: The man in the newscast setting talks to the reporter **remotely**.

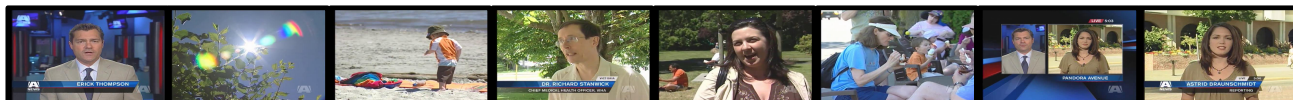

Ground-Truth 175.58s |-----> 206.57s

Figure 5. Examples in the novel-word split of the ActivityNet-CG dataset.



## References

- [1] Peter Anderson, Xiaodong He, Chris Buehler, Damien Teney, Mark Johnson, Stephen Gould, and Lei Zhang. Bottom-up and top-down attention for image captioning and visual question answering. In *CVPR*, 2018. 1
- [2] Joao Carreira and Andrew Zisserman. Quo vadis, action recognition? a new model and the kinetics dataset. In *proceedings of the IEEE Conference on Computer Vision and Pattern Recognition*, pages 6299–6308, 2017. 1
- [3] John Duchi, Elad Hazan, and Yoram Singer. Adaptive sub-gradient methods for online learning and stochastic optimization. *Journal of machine learning research*, 12(7), 2011. 1
- [4] Jiyang Gao, Chen Sun, Zhenheng Yang, and Ram Nevatia. Tall: Temporal activity localization via language query. In *Proceedings of the IEEE international conference on computer vision*, pages 5267–5275, 2017. 1
- [5] Kaiming He, Xiangyu Zhang, Shaoqing Ren, and Jian Sun. Deep residual learning for image recognition. In *Proceedings of the IEEE conference on computer vision and pattern recognition*, pages 770–778, 2016. 1
- [6] Will Kay, Joao Carreira, Karen Simonyan, Brian Zhang, Chloe Hillier, Sudheendra Vijayanarasimhan, Fabio Viola, Tim Green, Trevor Back, Paul Natsev, et al. The kinetics human action video dataset. *arXiv preprint arXiv:1705.06950*, 2017. 1
- [7] Ranjay Krishna, Yuke Zhu, Oliver Groth, Justin Johnson, Kenji Hata, Joshua Kravitz, Stephanie Chen, Yannis Kalantidis, Li-Jia Li, David A Shamma, Michael Bernstein, and Li Fei-Fei. Visual genome: Connecting language and vision using crowdsourced dense image annotations. 2016. 1
- [8] Jeffrey Pennington, Richard Socher, and Christopher D Manning. Glove: Global vectors for word representation. In *Proceedings of the 2014 conference on empirical methods in natural language processing (EMNLP)*, pages 1532–1543, 2014. 1
- [9] Shaoqing Ren, Kaiming He, Ross Girshick, and Jian Sun. Faster r-cnn: Towards real-time object detection with region proposal networks. *Advances in neural information processing systems*, 28:91–99, 2015. 1
- [10] Du Tran, Lubomir Bourdev, Rob Fergus, Lorenzo Torresani, and Manohar Paluri. Learning spatiotemporal features with 3d convolutional networks. In *Proceedings of the IEEE international conference on computer vision*, pages 4489–4497, 2015. 1
- [11] Yitian Yuan, Xiaohan Lan, Long Chen, Wei Liu, Xin Wang, and Wenwu Zhu. A closer look at temporal sentence grounding in videos: Datasets and metrics. *arXiv preprint arXiv:2101.09028*, 2021. 1
- [12] Yitian Yuan, Lin Ma, Jingwen Wang, Wei Liu, and Wenwu Zhu. Semantic conditioned dynamic modulation for temporal sentence grounding in videos. *arXiv preprint arXiv:1910.14303*, 2019. 1

918  
919  
920  
921  
922  
923  
924  
925  
926  
927  
928  
929  
930  
931  
932  
933  
934  
935  
936  
937  
938  
939  
940  
941  
942  
943  
944  
945  
946  
947  
948  
949  
950  
951  
952  
953  
954  
955  
956  
957  
958  
959  
960  
961  
962  
963  
964  
965  
966  
967  
968  
969  
970  
971
